# Supplementary material
Source: bioRxiv or medRxiv preprint supplement (https://www.biorxiv.org/highwire/filestream/51984/field_highwire_adjunct_files/8/173823-8.pdf)
Supplement: Supplementary file [file 173823-8.pdf]

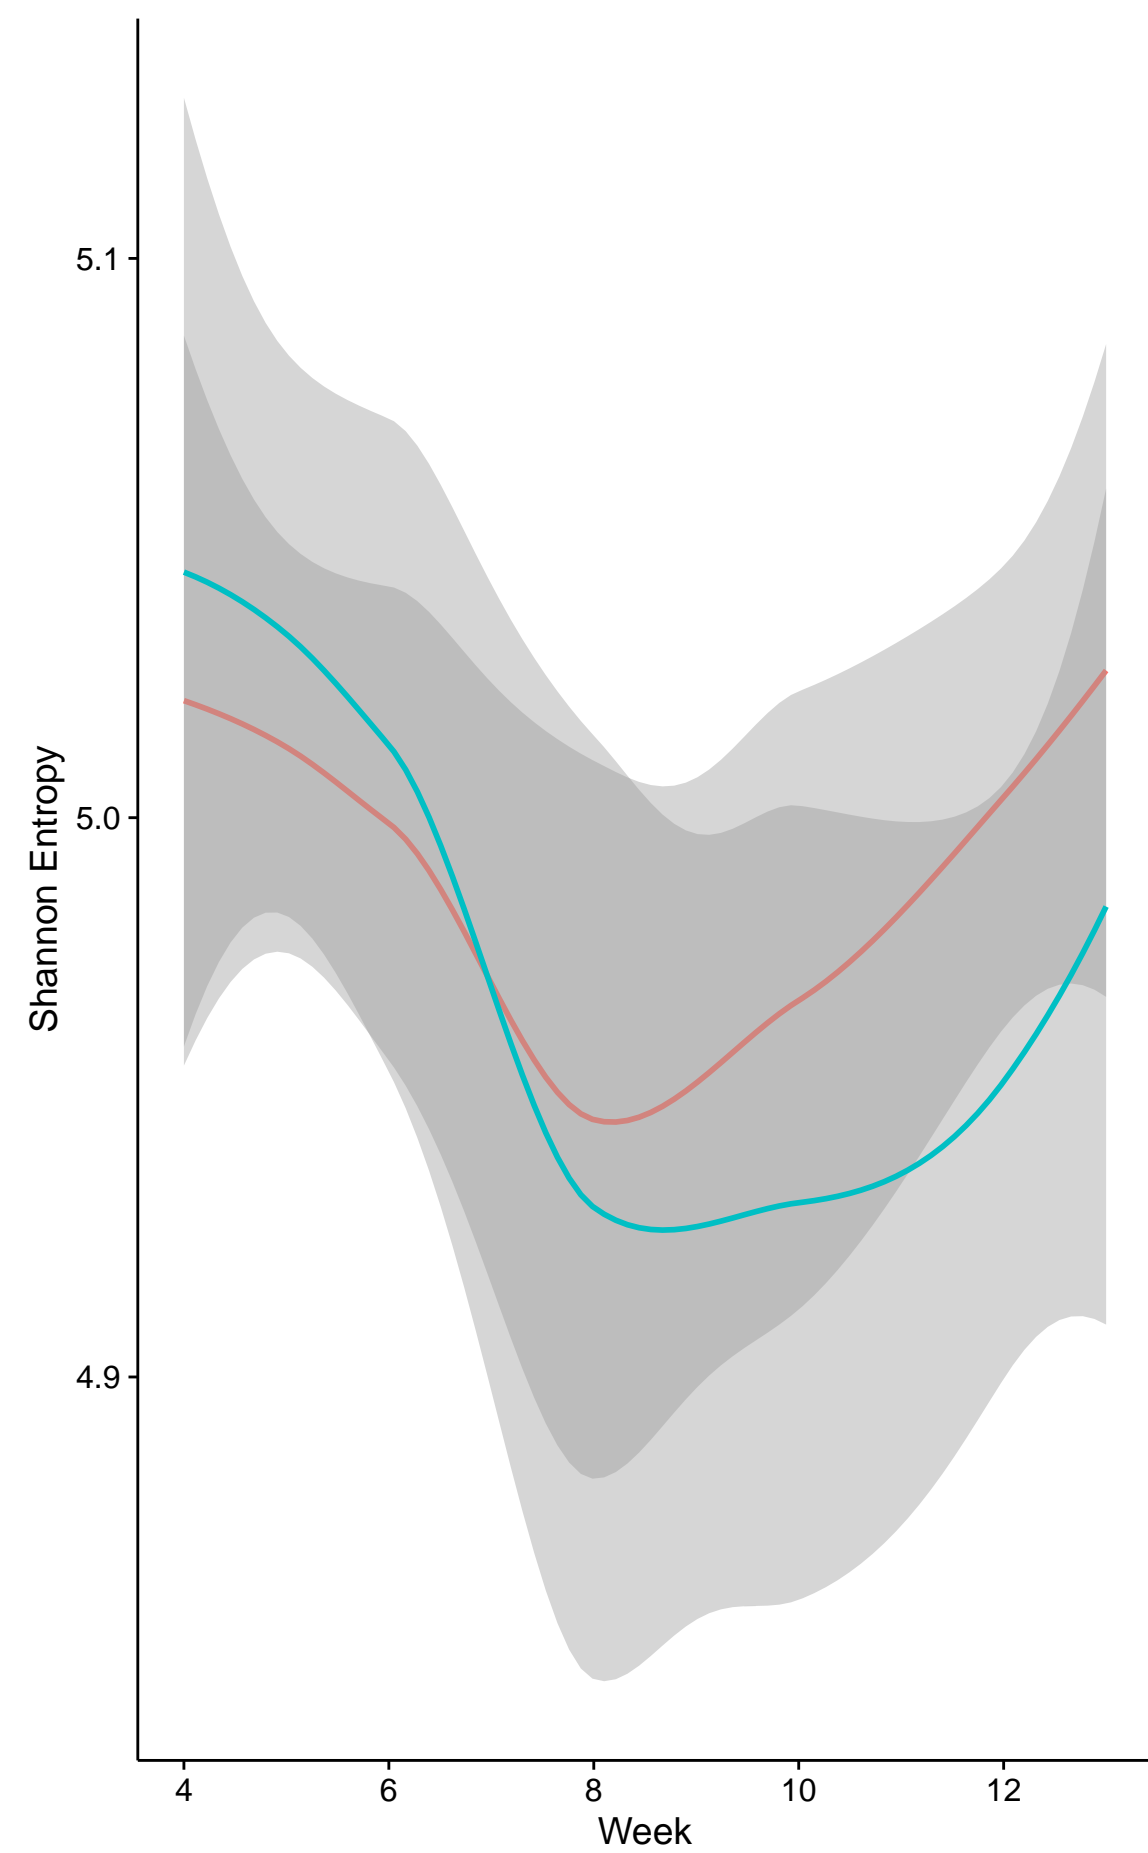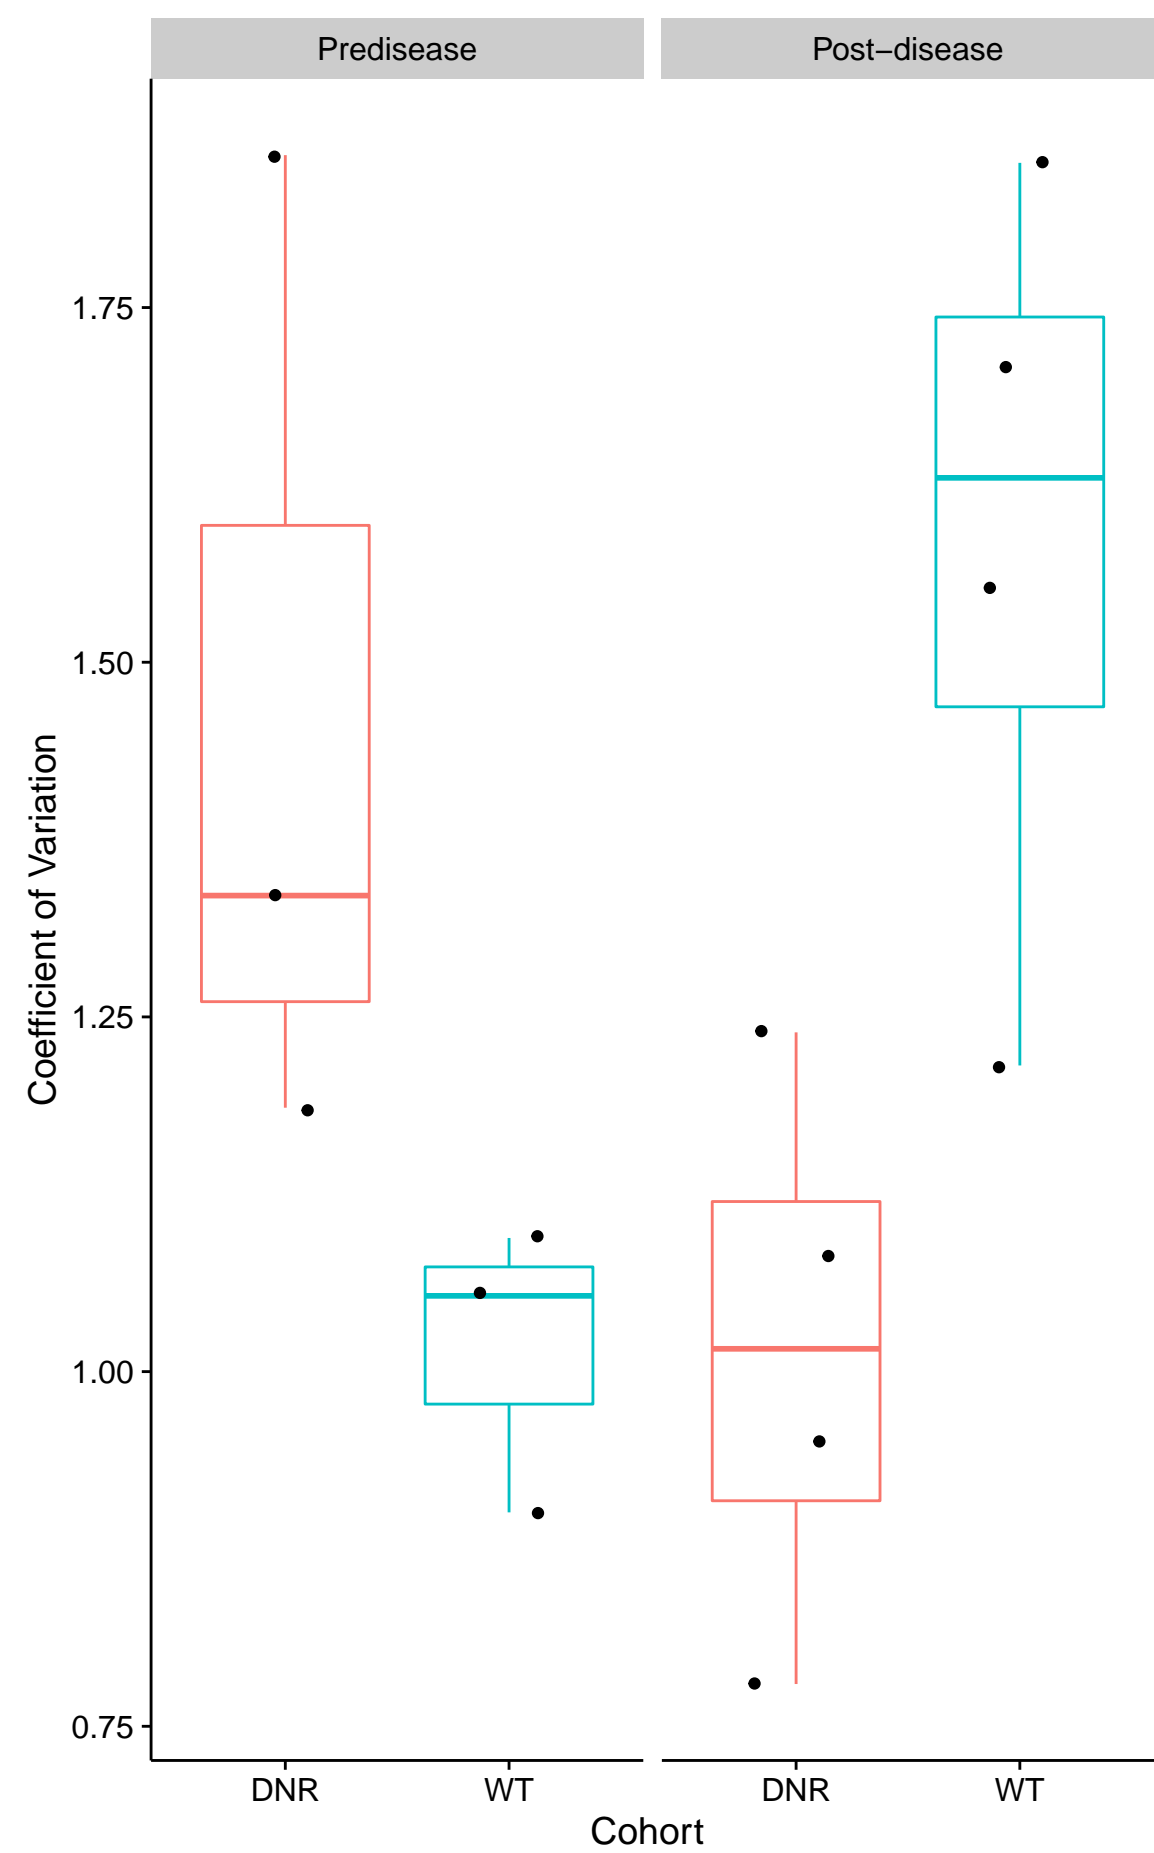

cohort — DNR — WT
